# Supplementary material
Source: Research Square preprint supplement (doi:10.21203/rs.3.rs-9286271/v1)
Supplement: Supplementary file 1 [file 457e1219ebf4d0633ac1b17f.docx]

Table 1: Teaching Plan and Schedule for Day 1

| **Day** | **Module** | **Venue** |
| --- | --- | --- |
| **Day 1** | **Financial Elite Journey**   - Trainees will have the opportunity to visit the National Bank Museum of Malaysia and experience the social practice of what they learn in the classroom. - Participants will also have the chance to experience an immersive journey, which stand in a policymaker’s perspective. And a glimpse into the leading institutions such as the South East Asian Central Banks (SEACEN), and Asia School of Business (ASB). It should be a unique financial experience for them | Asia School of Business (ASB) |

Table 2: Teaching Plan and Schedule for Day 2

| **Day** | **Module** | **Venue** |
| --- | --- | --- |
| **Day 2** | **Real Estate Investment Trust (REITs), Investment and Industrial Heritage Case Study 1**   - The instill of REITs emphasizes the strong liquidity, cash flow, and advantages of this financial instrument. In Malaysia, REITs such as Pavilion REIT and Sunway REIT have all demonstrated a stable and considerable revenue, which has grown over the past few years. - The Industrial Heritage part has indoctrinated the conception of both “Industrial” and “Heritage”. It helps participants learn about the real-life case studies of the Ruhr area in Germany and the Capital Steel Park (Shou Gang Park) in China. | University Classroom |

Table 3: Teaching Plan and Schedule for Day 3

| **Day** | **Module** | **Venue** |
| --- | --- | --- |
| **Day 3** | **Industrial Heritage Case Study 2**   - Visiting the Zhongshan Building, ask the student to conduct a field survey and investigation. | The Zhongshan Building  Jalan Kampung Attap, 80 - 84, Jalan Rotan |

Table 4: Teaching Plan and Schedule for Day 4

| **Day** | **Module** | **Venue** |
| --- | --- | --- |
| **Day 4** | - Conclusion for the 3-Day Course and Investigation - Presentation & Certification Awarding | University Classroom |
